# Supplementary material
Source: Springer Nature journal article supplement (https://www.springermedizin.de/resource/supplementary/12891_2013_1945_MOESM3_ESM.pdf/9508860)

## Chi (mechanical axis)

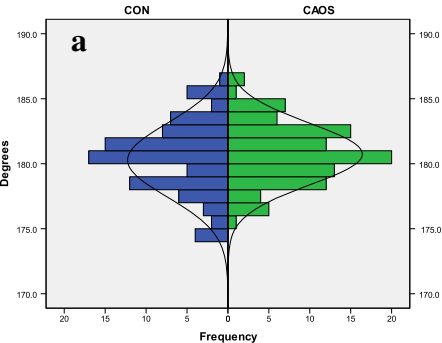

## Alpha (femoral component alignment)

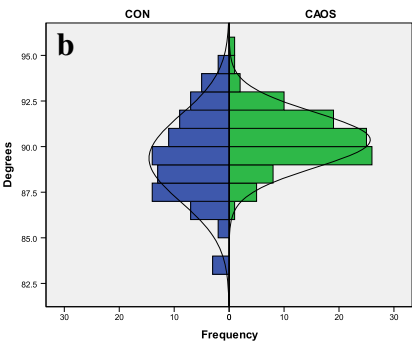

## Beta (tibial component alignment)

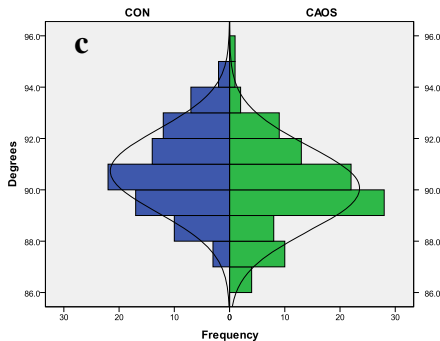

Supplement: MOESM3 [file 9508860]
